# Supplementary material for: Single-molecule methylation profiles of cell-free DNA in cancer with nanopore sequencing
Source: PubMed Central journal article supplement (PMC10155347; doi:10.1186/s13073-023-01178-3), 2023-05-03
Supplement: 13073_2023_1178_MOESM1_ESM.pdf [file 13073_2023_1178_MOESM1_ESM.pdf]

## **SUPPLEMENTARY INFORMATION**

### **TITLE**

Single molecule methylation profiles of cell-free DNA in cancer with nanopore sequencing

### **AUTHORS**

Billy T. Lau<sup>1</sup>, Alison Almeda, Marie Schauer<sup>1</sup>, Maddy McNamara<sup>1</sup>, Xiangqi Bai<sup>1</sup>, Qingxi Meng<sup>2</sup>, Mira Partha<sup>2</sup>, Susan M. Grimes<sup>1</sup>, HoJoon Lee<sup>1</sup>, Gregory M. Heestand<sup>1</sup>, Hanlee P. Ji<sup>1,2</sup>

<sup>1</sup>Division of Oncology, Department of Medicine, Stanford School of Medicine, Stanford CA

<sup>2</sup>Department of Electrical Engineering, Stanford University, Stanford CA

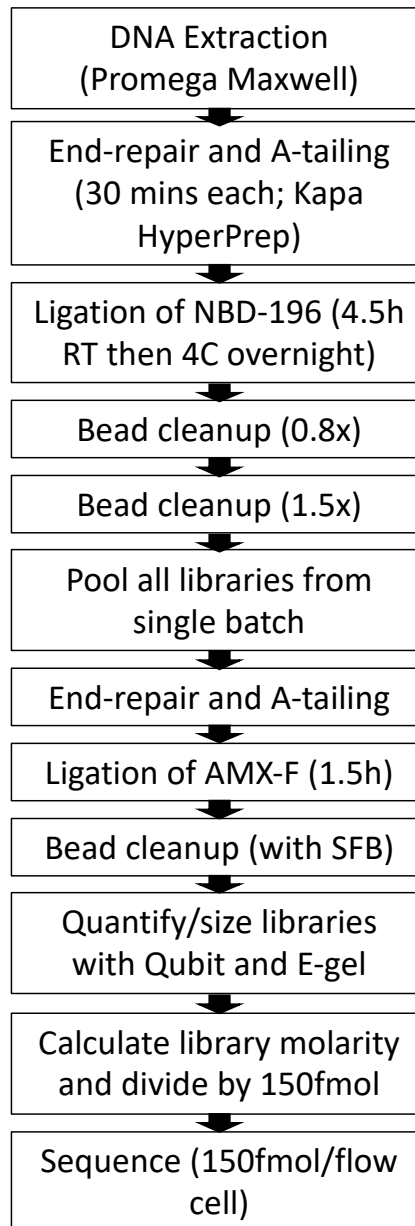

**Supplementary Figure 1. Sequencing library preparation workflow.** The library preparation workflow used in this study for cfDNA samples. Sequencing was conducted on the Oxford Nanopore platform. These steps maximized ligation yields versus standard protocols.

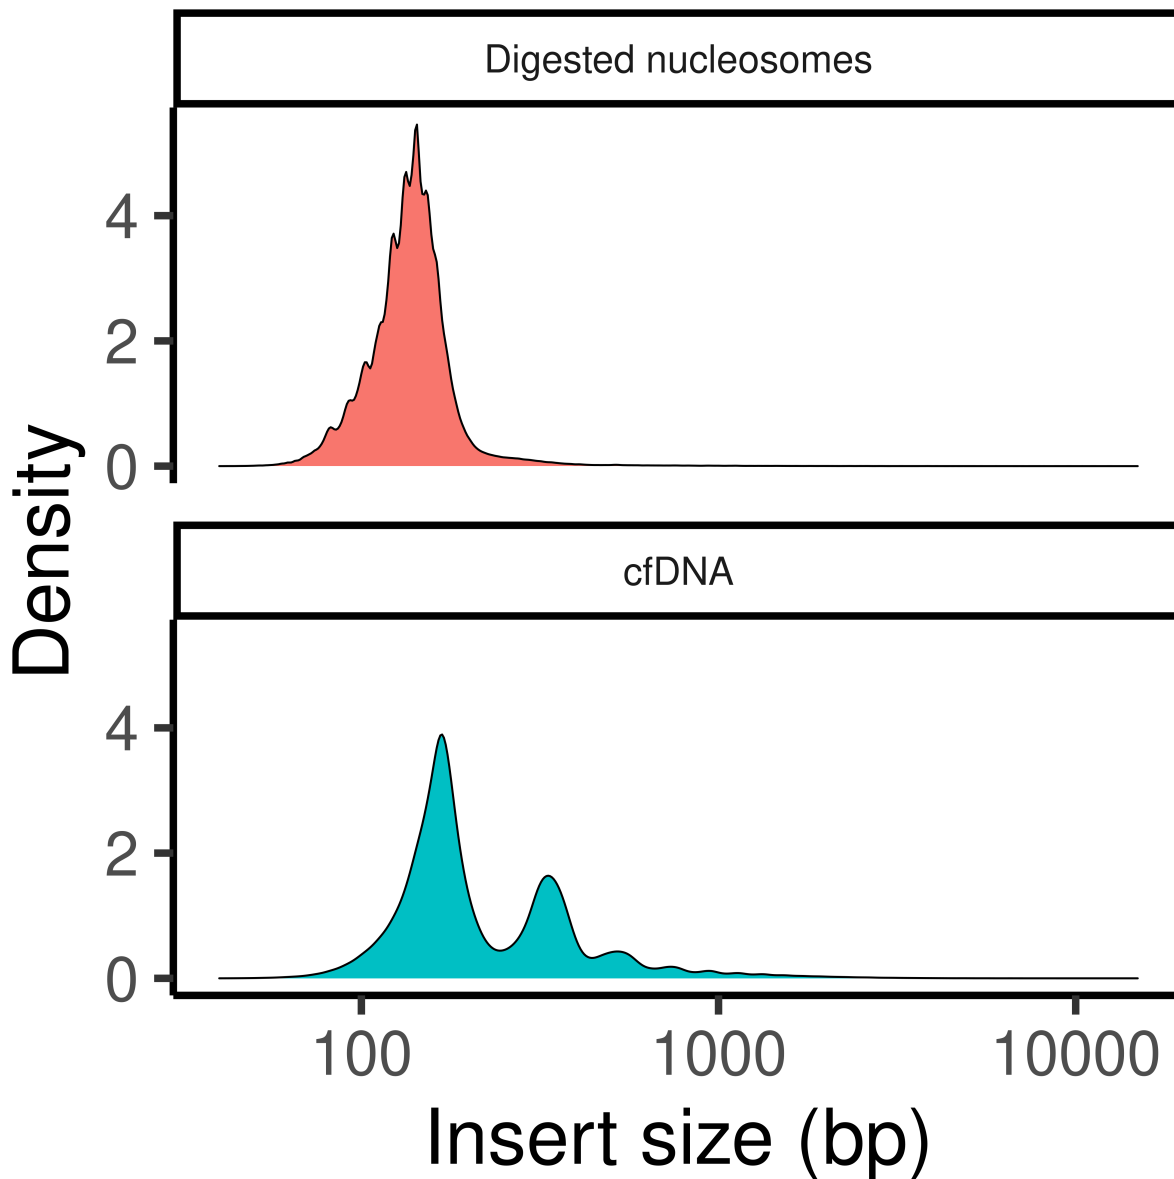

**Supplementary Figure 2. Digested nucleosome size comparison with cfDNA.** The insert size distribution of digested PBMC nucleosomes (top), which was used as a model analyte. This size distribution was compared to the size distribution of cfDNA. Secondary peaks in the cfDNA distribution correspond to dinucleosomes and higher sizes. The PBMC nucleosomes consisted only of mononucleosomes due to complete digestion of the open chromatin.

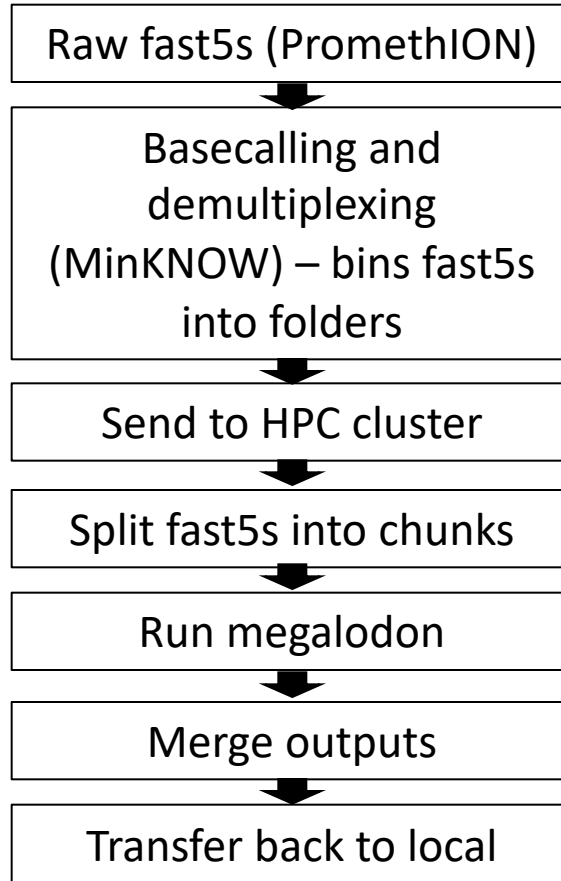

**Supplementary Figure 3. Computational workflow.** The workflow for calling methylation from nanopore-based cfDNA sequencing data is shown. These steps enable streamlined processing of large data volumes (>10TB).

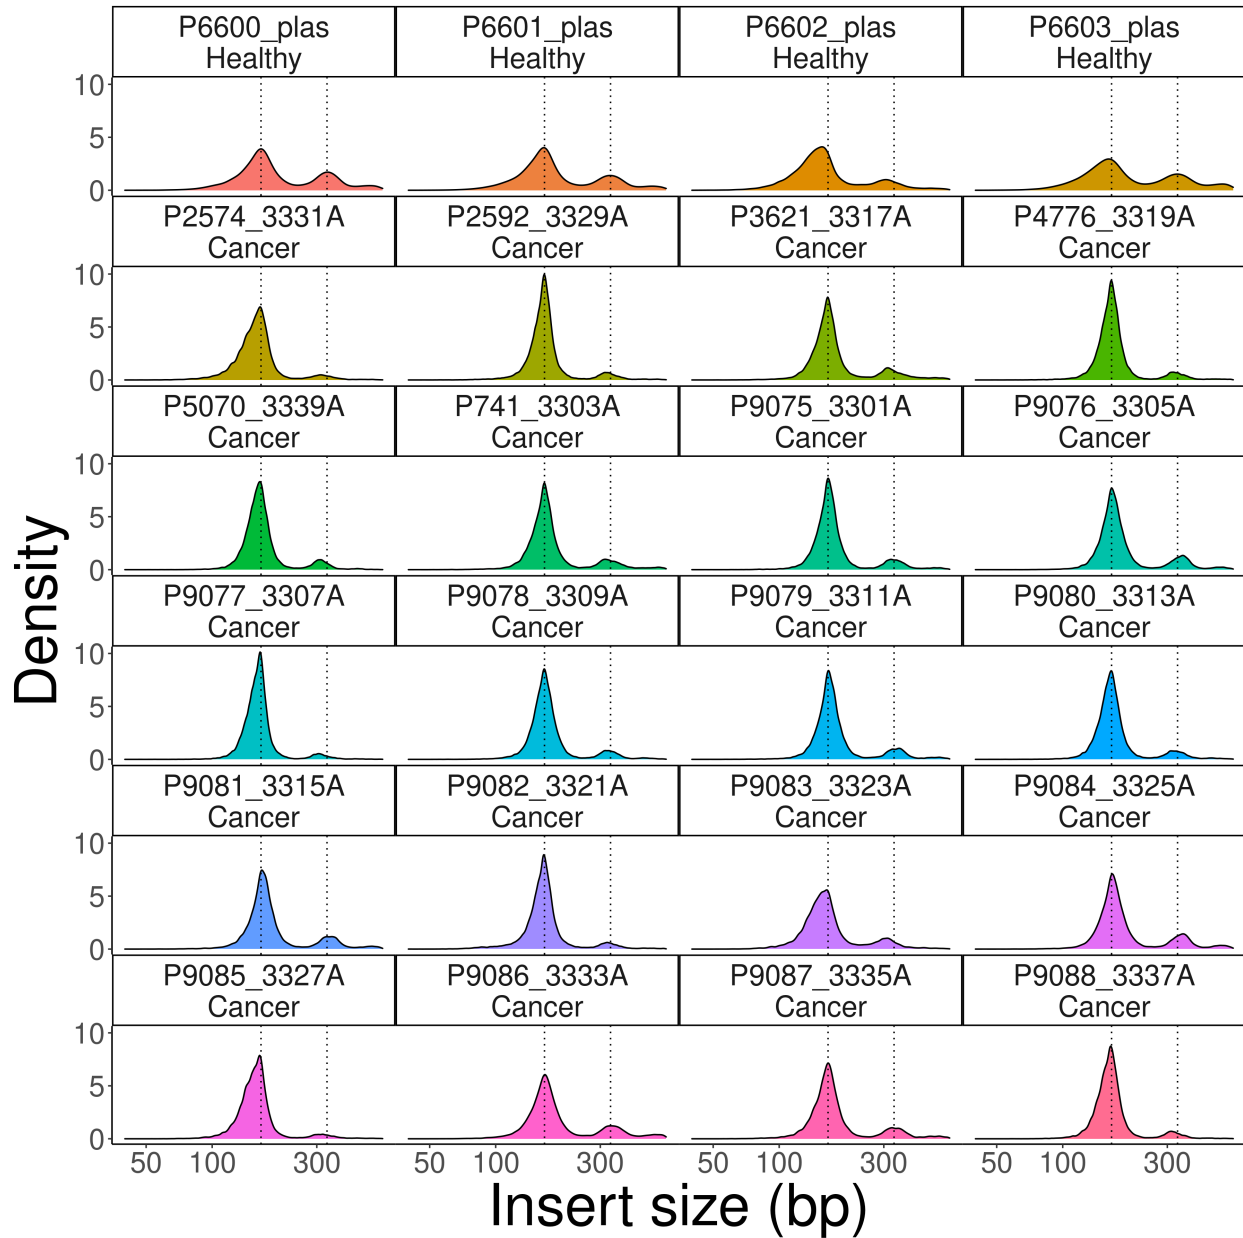

**Supplementary Figure 4. Fragment size distribution of healthy donor and cancer patient cfDNA.** The fragment size distribution of healthy control plasma and cancer patient-derived plasma is shown. The top row consists of cfDNA samples from healthy controls. The remaining rows come from cancer patients. Dotted lines indicated mono- and di-nucleosomes.

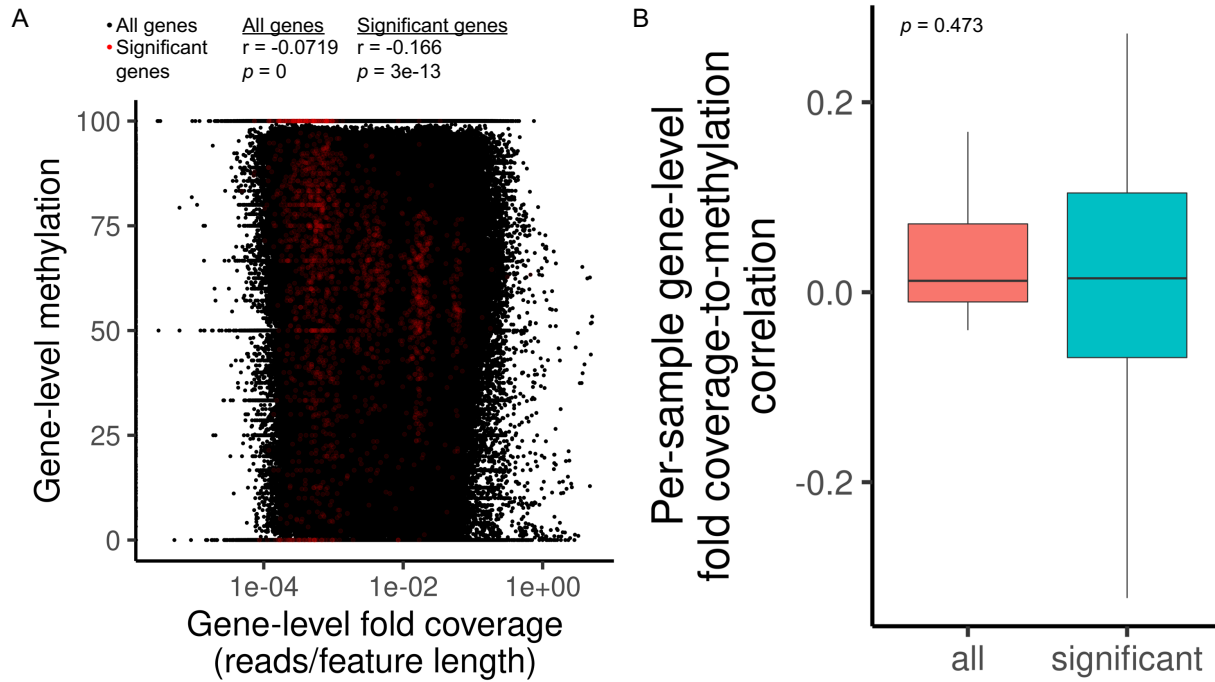

**Supplementary Figure 5. Correlation between gene-level fold coverage and gene-level methylation.** (A) The fold coverage of a specific genomic feature and its corresponding methylation is plotted. Fold coverage is defined as number of reads divided by the length of the feature. A single point represents a particular gene for one sample. Black: all features are considered. Red: genes found to be statistically significant between cancer patients and healthy controls. The overall Pearson correlation coefficient for all features and statistically shown genes is also displayed. (B) Per-sample fold-coverage to methylation correlation. The Pearson correlation of the gene-level methylation versus the gene-level fold-coverage is shown for each individual sample. A t-test was performed between the correlation when calculated on all genes versus only statistically significant genes, demonstrating that the differences in their correlation were not statistically significant. This shows that the statistically significant genes were selecting for differences in sequencing coverage.

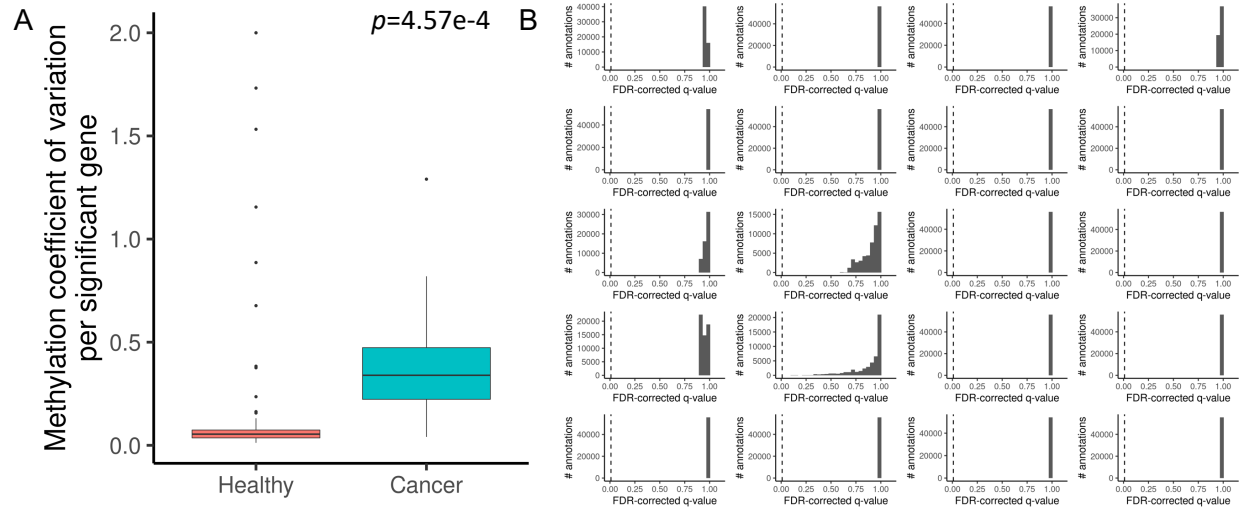

**Supplementary Figure 6. Analysis of variability in gene-level methylation. (A) Analysis of within-group variability for differentially methylated genes.** We identified genes with different levels of methylation when comparing cfDNA from cancer patient versus healthy controls. Genes that passed an FDR-based multiple-testing significance value of  $q < 0.01$  were considered to have differential methylation. We calculated the coefficient of variation for the methylation values of each gene based on cancer patients versus controls. **(B) Random grouping.** We randomly assigned the healthy controls and cancer patients into random groups and attempted to discover differentially methylated genes. After FDR-multiple testing correction, there were zero gene annotations passing the  $q < 0.01$  threshold. We repeated this process 20 times. Each facet represents the q-value distribution for each trial. The dashed line represents the 0.01 threshold.

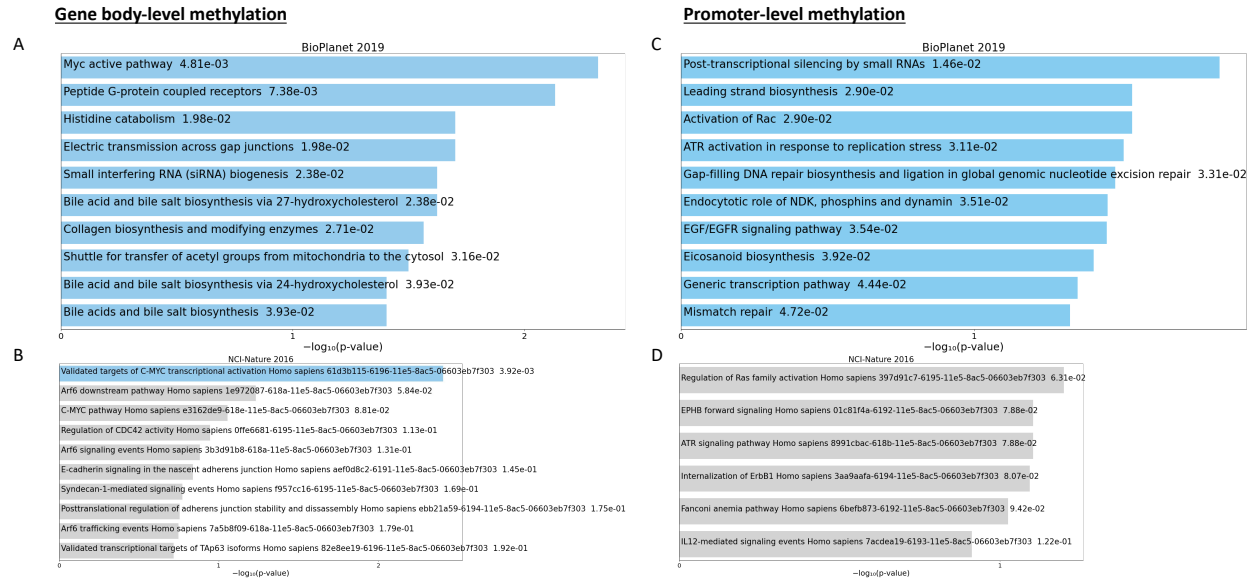

**Supplementary Figure 7. Enrichment analysis for cancer patient cohort.** Gene-level (left) and promoter-level (right) enrichment analysis was performed for significantly different genes between healthy and cancer patient-derived cfDNA. p-values are shown, alongside the associated pathway. Blue bars indicate  $p < 0.05$ . A, C and B, D refer to two separate gene pathway sets curated by EnrichR.



**1. Determine read-level methylation**

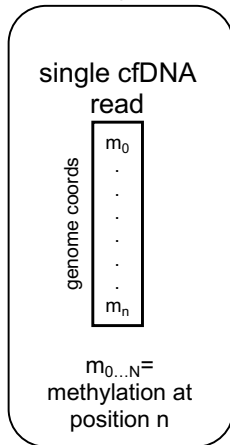

**2. Calculate similarity score to references**

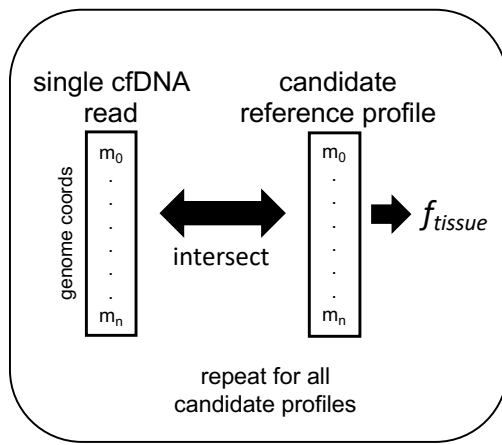

**3. Process all reads**

**tumor score**

$$p_i = f_{tumor} / (f_{tumor} + f_{immune})$$

**Supplementary Figure 8. Framework for read classification.** Individual nanopore reads from cfDNA are classified by using reference profiles that come from matched tumor or PBMC/immune cell methylation data. Each read, their associated CpG sites, and their methylation states, are compared to candidate references. The calculated score reflects the similarity of a read to a particular candidate reference methylome. Regardless of their methylation status, all reads were processed with this framework.

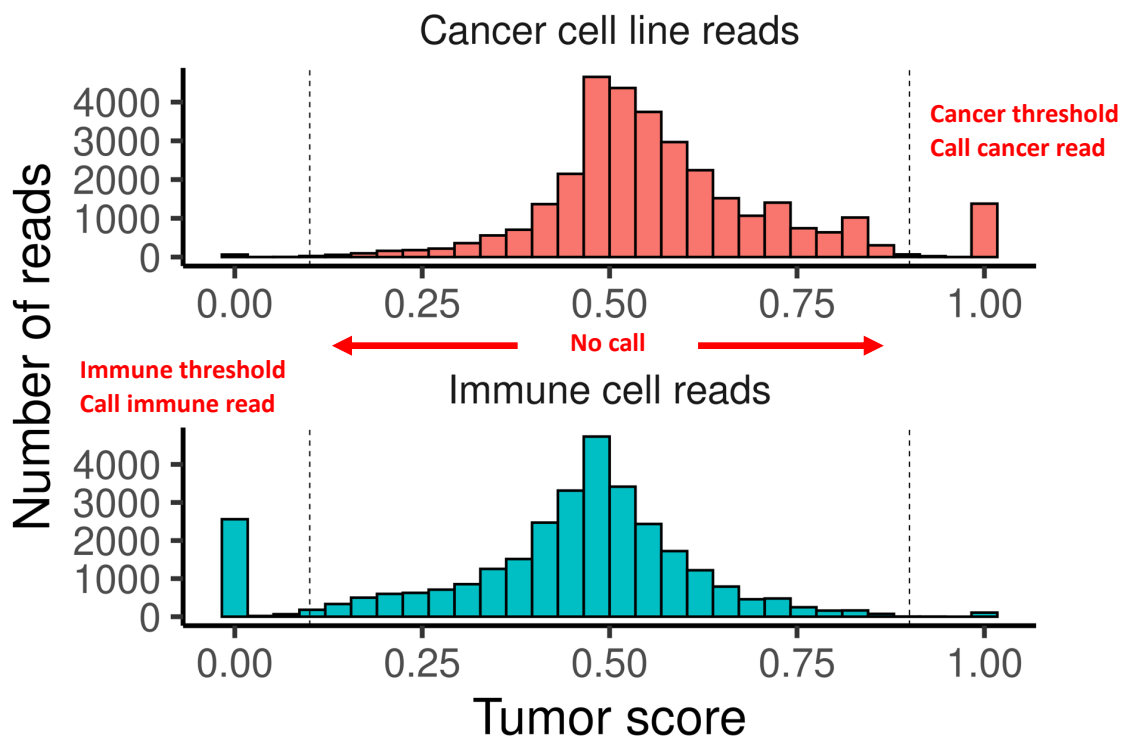

**Supplementary Figure 9. Distribution of tumor classification scores for single reads.** We provide an example of a tumor score histogram using an *in silico* admixture read data set. Each read has a calculated tumor score based on its methylation similarity to a matched tumor or immune reference profile. The title of each panel reflects the ground truth origin of each read set. Cancer reads are sequences that are mixed from GP2D cancer cell line nucleosomes that were nanopore sequenced and for which methylation calls were made, and immune cell reads are reads that are from healthy donor nucleosomes. There are two classification thresholds: one for immune cell origin, and one for classification of cancer cell origin. Reads matching the threshold criteria, such as tumor score  $> 0.9$  or  $< 0.1$ , are classified as tumor-specific or immune-specific respectively. Reads falling outside the thresholds are not classified and are excluded from analysis.

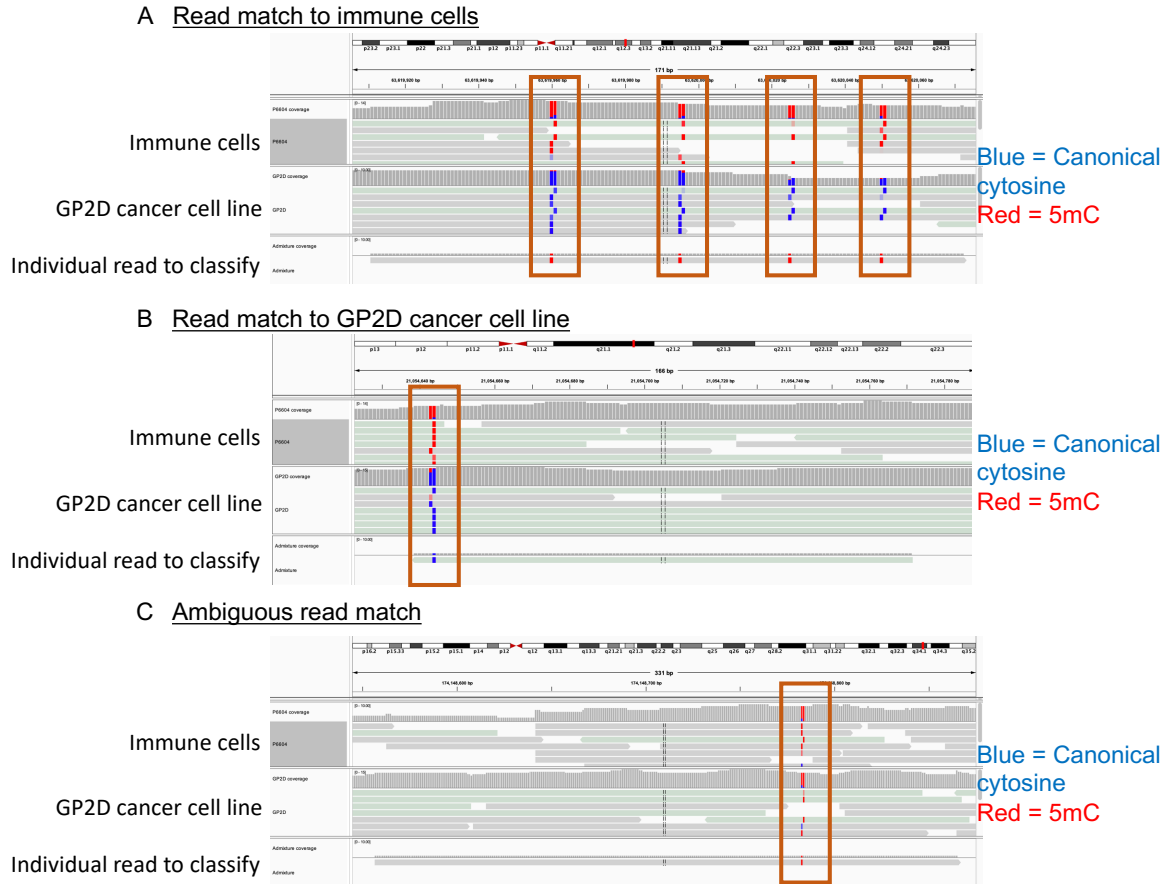

**Supplementary Figure 10. Examples of read classification.** The methylation profiles of immune cells and the GP2D cancer cell line are shown in selected regions, along with an individual read to classify. The shaded bases correspond to a CpG site; blue represents a canonical cytosine, while red corresponds to a detected 5mC. An *in silico* mixture of reads from both sources are sampled. An individual read is classified if its methylation matches (A) immune cells, or (B) the cancer cell line GP2D. Ambiguous matches (eg. regions where the methylation is the similar for both samples) are shown in (C).

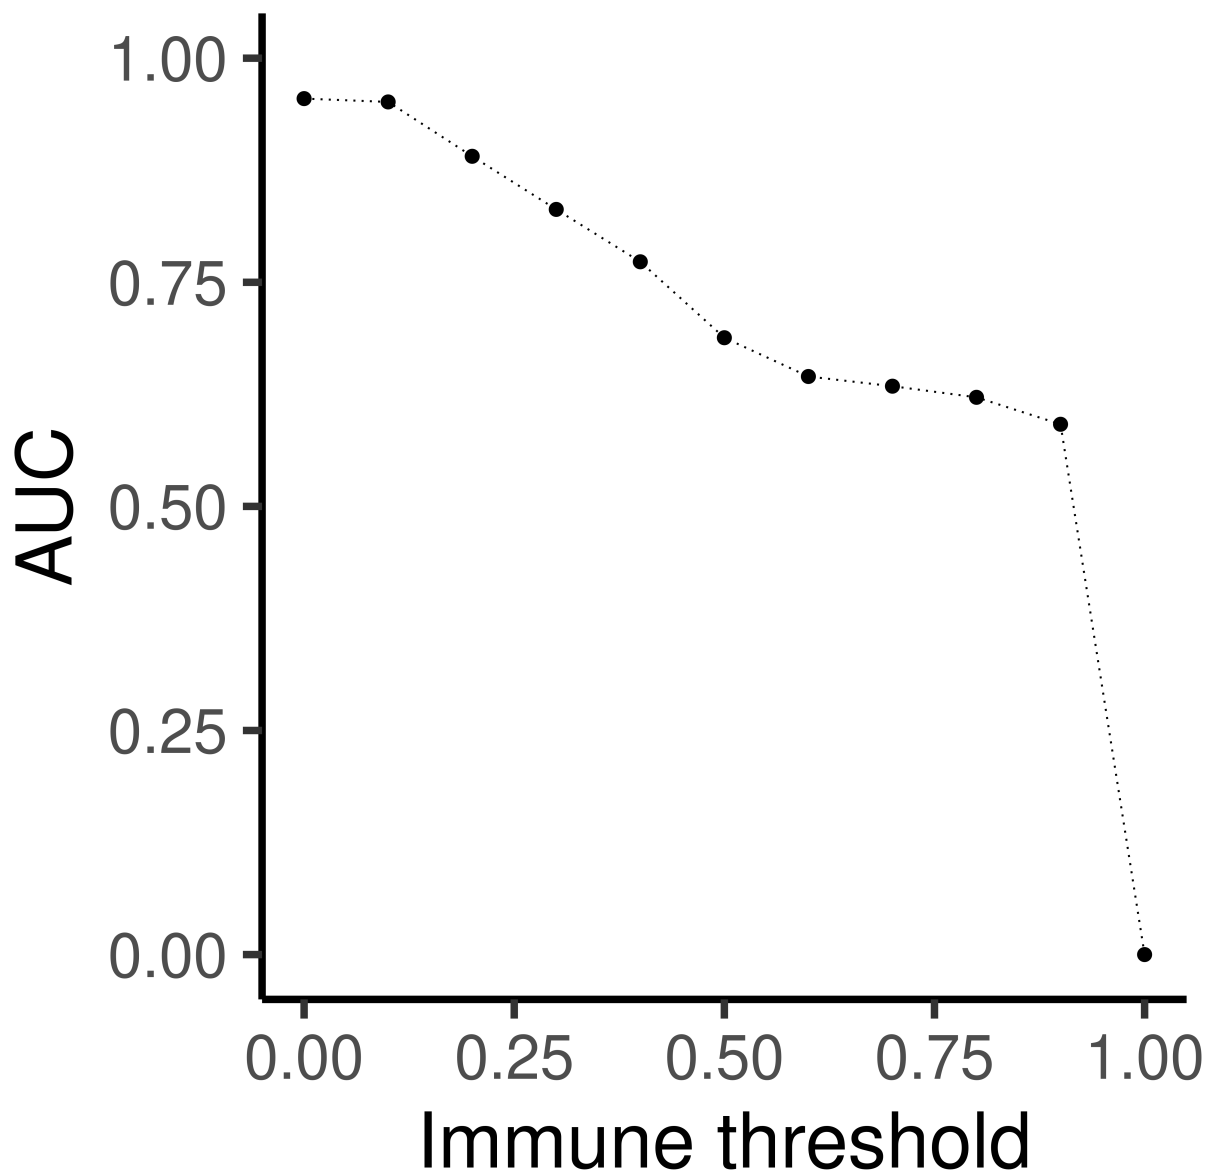

**Supplementary Figure 11. Classification AUC for various thresholds.** The AUC is calculated for various immune threshold values for one set of an *in silico* admixture between cancer cell line and healthy donor methylome data.

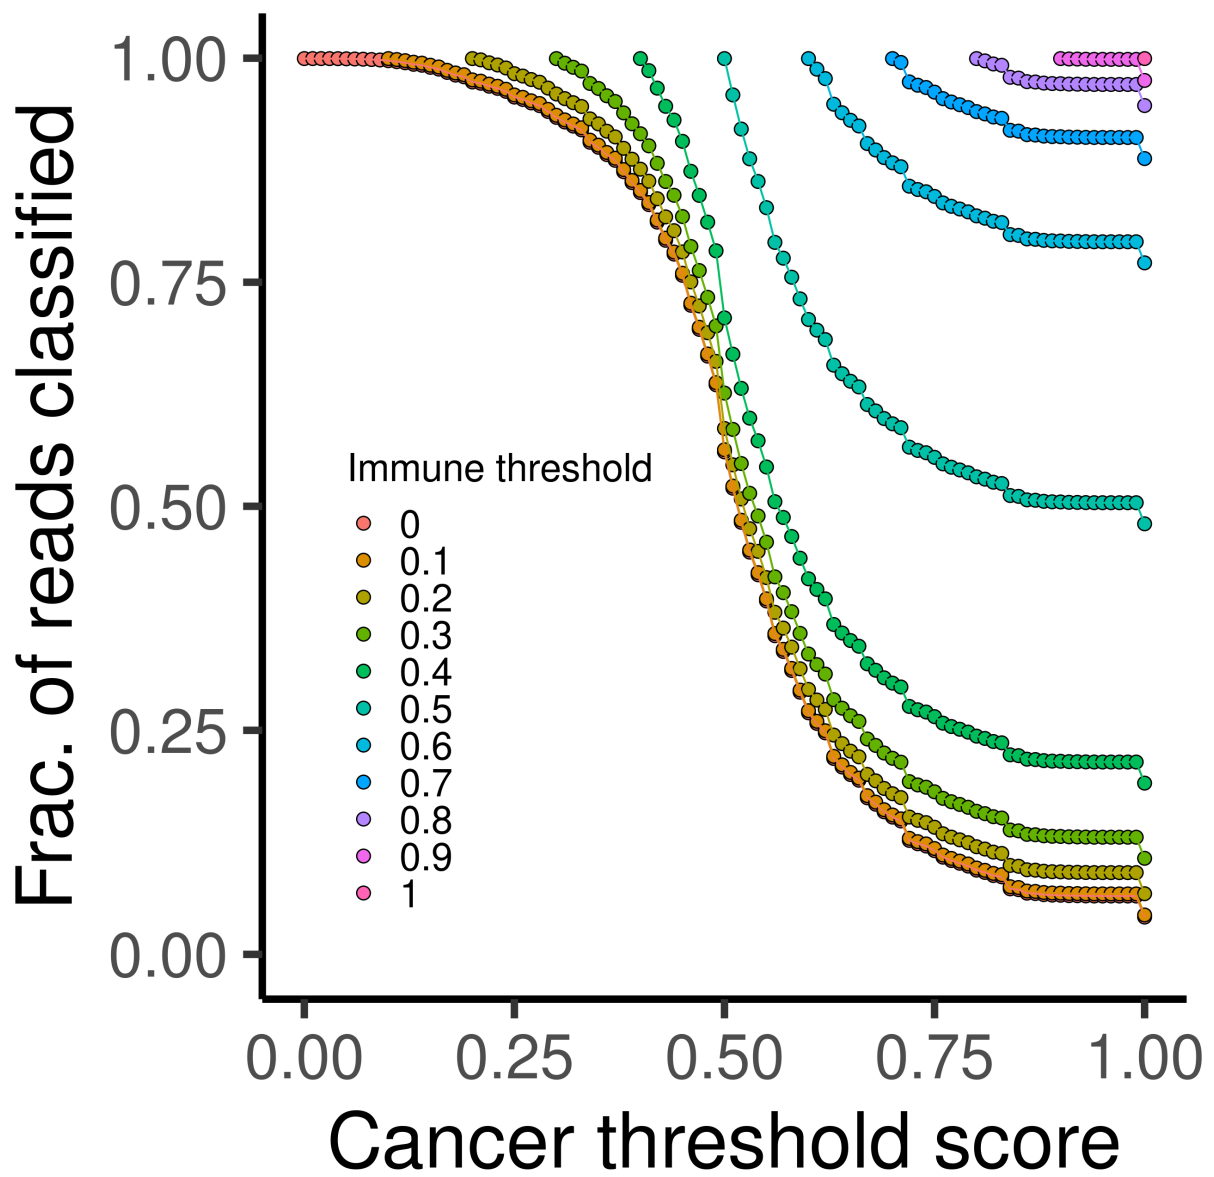

**Supplementary Figure 12. Fraction of reads classified.** The proportion of reads being classified is shown for various immune threshold values for one set of an *in silico* mixture between cancer cell line and healthy donor methylome data.

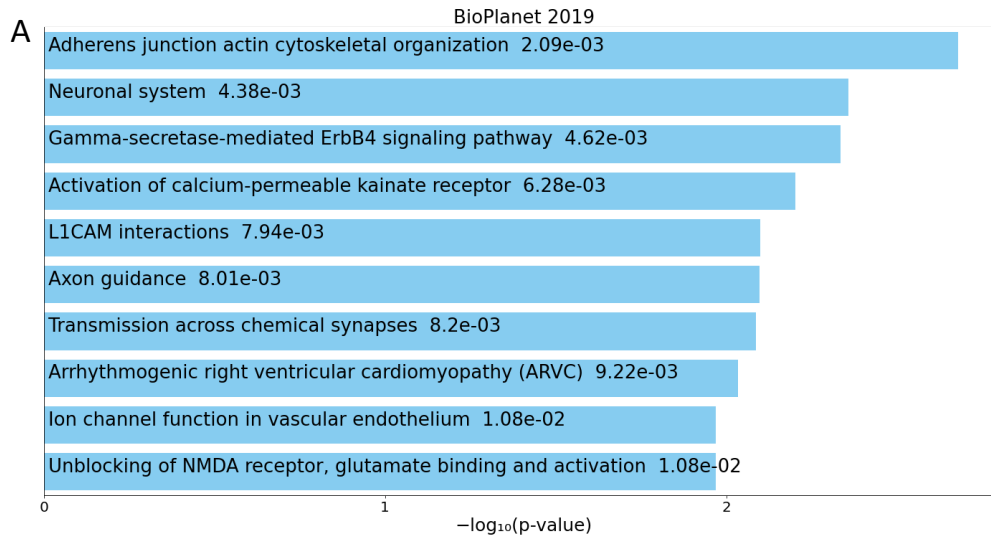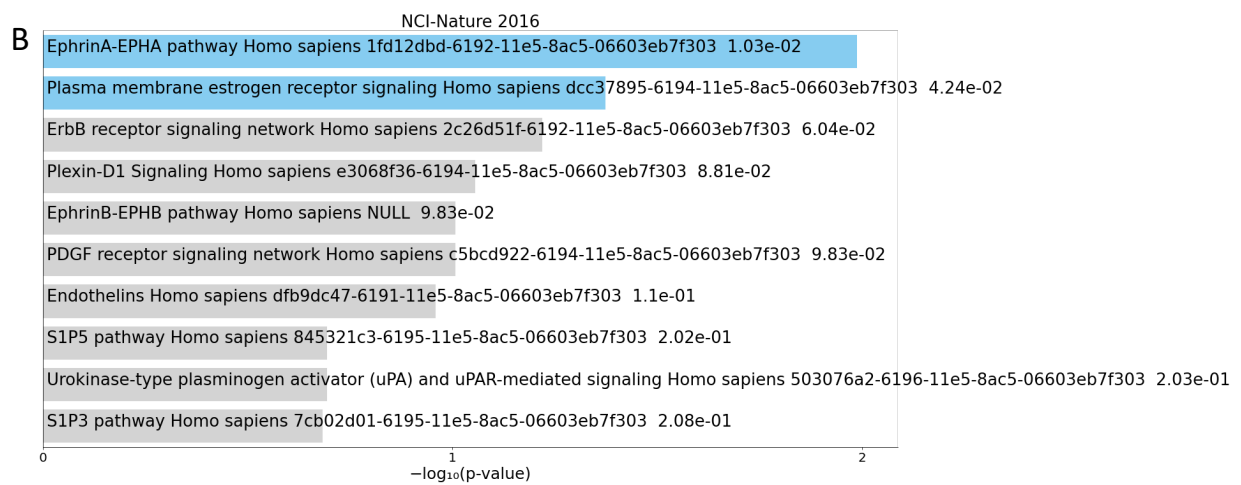

**Supplementary Figure 13. Gene enrichment analysis for single molecular classifier using a GP2D cancer cell line and immune cell model.** Regions with maximum methylation differences (eg. either 100% methylated in GP2D and 0% methylated in immune cells, or vice versa) between the cancer cell line and immune cells are intersected with GENCODE v38 gene-level annotations. These features are then subject to pathway enrichment analysis using different curated pathway sets in EnrichR.

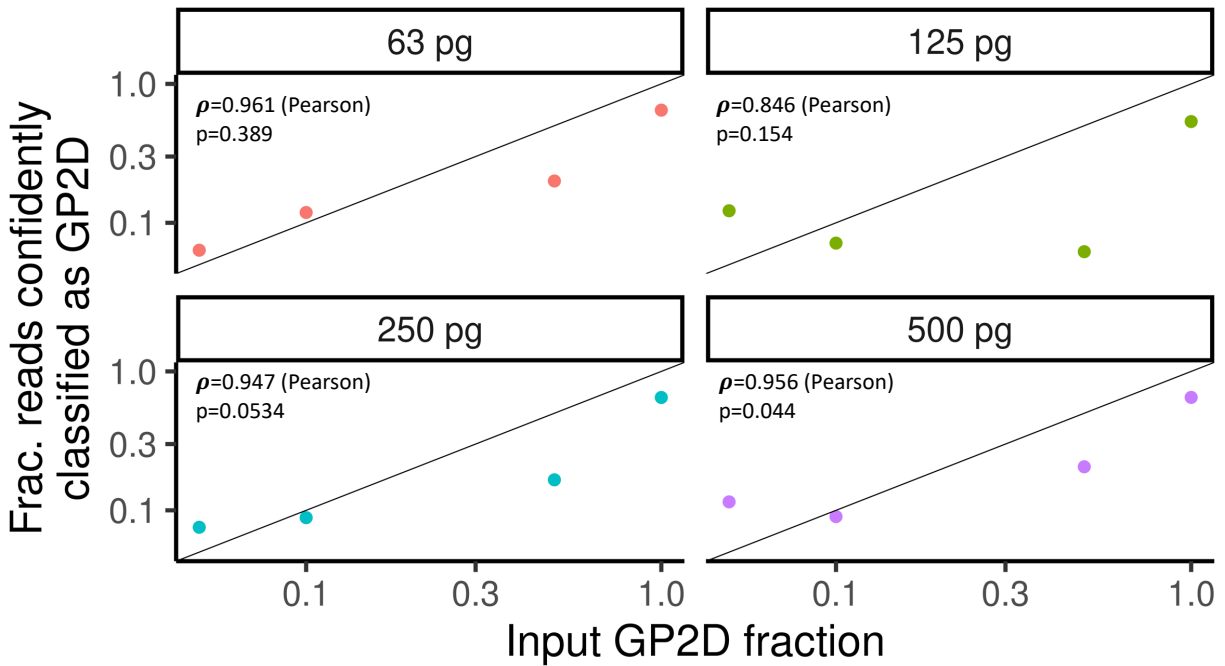

**Supplementary Figure 14. Experimental admixtures.** Experimental admixtures were performed between digested nucleosomes of the cancer cell line GP2D and healthy donor PBMCs. Various mixture fractions and input amounts are shown.

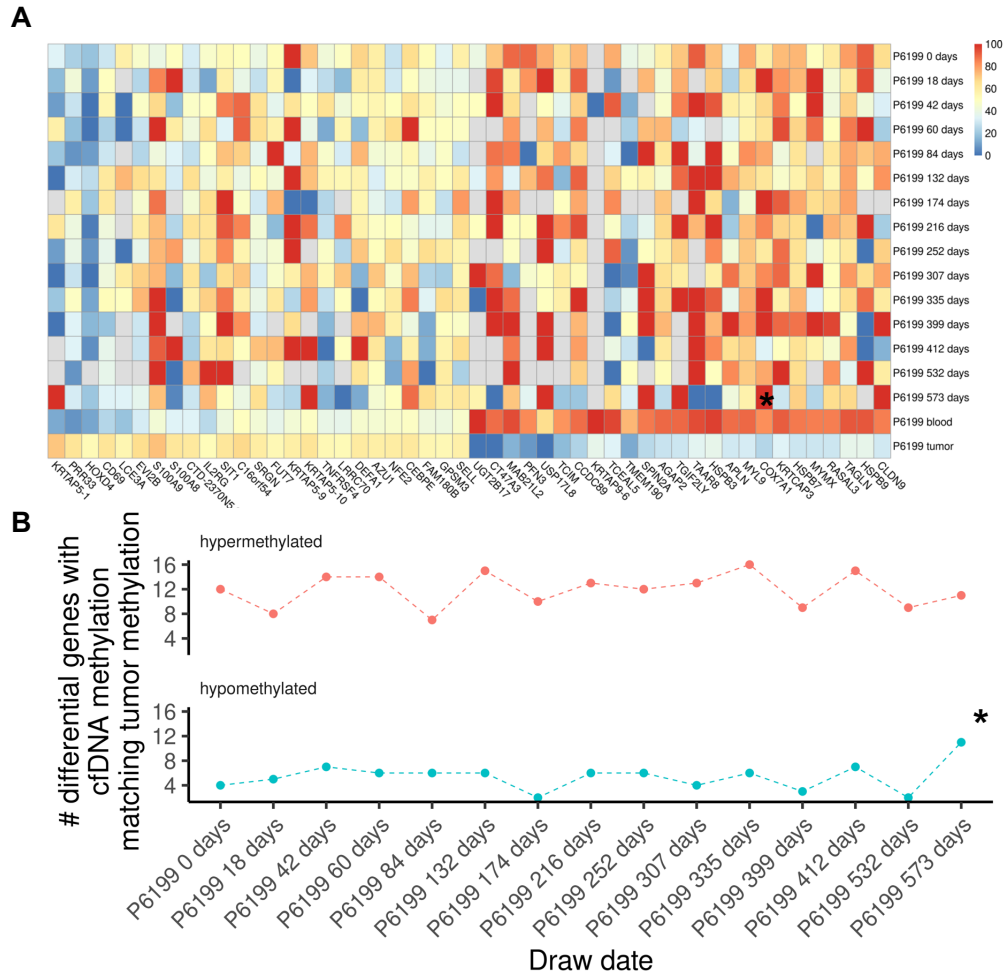

**Supplementary Figure 15. Gene-level visualization for longitudinally collected plasma samples for patient P6199.** (A) Gene-level methylation is shown from the analysis of longitudinal cfDNA data as well as the matched tumor and immune methylomes. The top and bottom 25 genes with differing methylation between the primary tumor and immune cells were selected. Gray boxes indicate no reads were obtained for that sample. (B) The number of tumor-specific differentially methylated genes found to be matching in cfDNA is shown for each time point. Differentially methylated genes were defined as those with the largest difference in methylation between the primary tumor and immune cells. Such methylated genes observed in cfDNA are defined as matching the primary tumor when its methylation state (eg. hypermethylation or hypomethylation) is concordant. Specific time points are annotated with asterisks to denote clinical events with significant changes in methylation.



## P4822 – Metastatic pancreatic neuroendocrine carcinoma

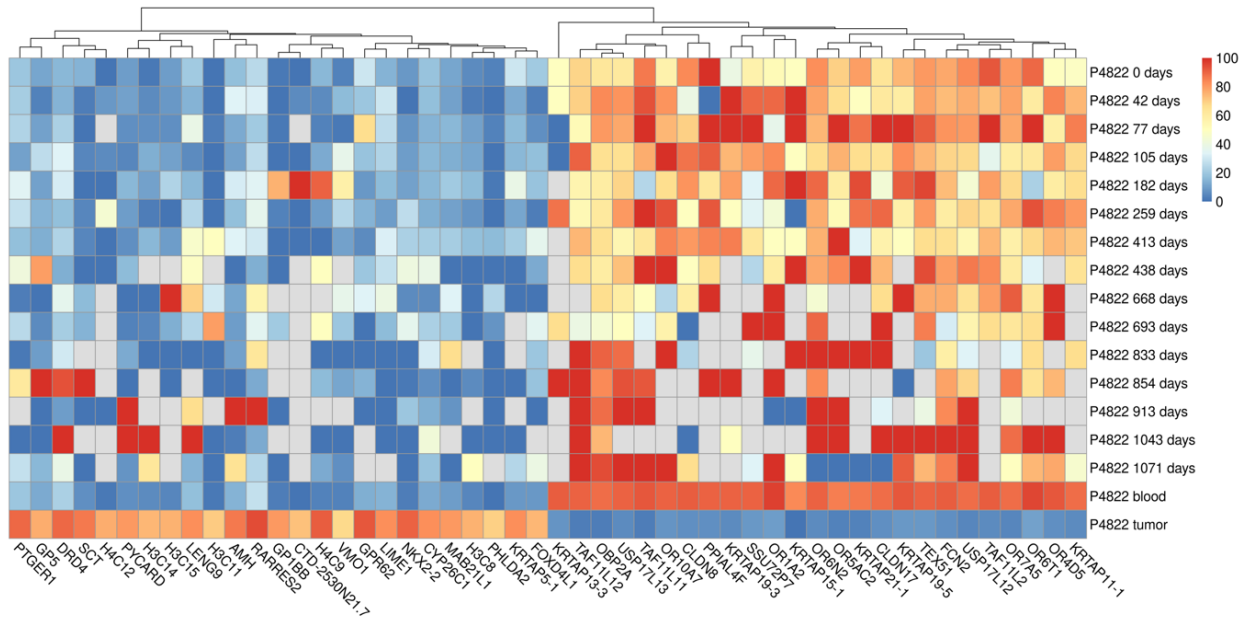

**Supplementary Figure 16. Gene-level visualization for patient P4822 with metastatic pancreatic neuroendocrine carcinoma.** Gene-level methylation is shown from the analysis of longitudinal cfDNA data as well as the matched tumor and immune methylomes. The top and bottom 25 genes with differing methylation between the primary tumor and immune cells were selected. Gray boxes indicate no reads were obtained for that sample.

## P6527 – Intrahepatic cholangiocarcinoma

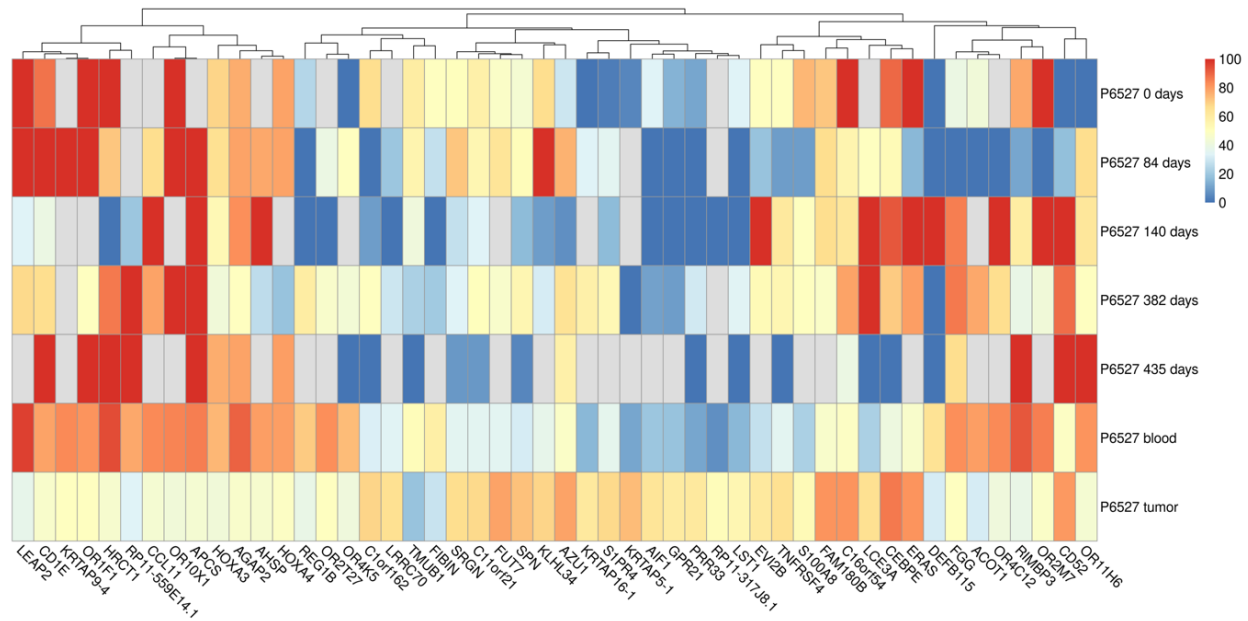

**Supplementary Figure 17. Gene-level visualization for patient P6527 with metastatic cholangiocarcinoma.** Gene-level methylation is shown from the analysis of longitudinal cfDNA data as well as the matched tumor and immune methylomes. The top and bottom 25 genes with differing methylation between the primary tumor and immune cells were selected. Gray boxes indicate no reads were obtained for that sample.



**Supplementary Table 2. Patient Information**

| Patient | Sequencing run batch ID                                                                | TNM staging reported at surgery | Number of time points | Primary tumor available/sequenced |
|---------|----------------------------------------------------------------------------------------|---------------------------------|-----------------------|-----------------------------------|
| P4822   | Metastatic Pancreatic Neuroendocrine Carcinoma                                         | N/A                             | 14                    | Y                                 |
| P6199   | Invasive Adenocarcinoma, Poorly Differentiated, Extending Into Pericolonic Soft Tissue | ypT3 pN2b                       | 15                    | Y                                 |
| P6527   | Intrahepatic Cholangiocarcinoma, Moderately Differentiated                             | ypT2 pN0                        | 5                     | Y                                 |
| P9075   | Invasive Adenocarcinoma                                                                | pT3 pN2a                        | 1                     | N                                 |
| P741    | Moderately Differentiated Colorectal Adenocarcinoma                                    | pT4 pN2 pM1                     | 1                     | N                                 |
| P9076   | Recurrent Adenocarcinoma, Colorectal Primary                                           | pT3 pN1a                        | 1                     | N                                 |
| P9077   | Invasive Adenocarcinoma                                                                | pT3 pN1b pM1a                   | 1                     | N                                 |
| P9078   | Invasive Adenocarcinoma                                                                | ypT2 ypN0 ypM0                  | 1                     | N                                 |
| P9079   | Adenocarcinoma, Cribriform Comedo Type                                                 | pT2 pN0                         | 1                     | N                                 |
| P9080   | Invasive Adenocarcinoma/Metastatic Adenocarcinoma                                      | ypT2 ypN2a ypM1                 | 1                     | N                                 |
| P9081   | Invasive Adenocarcinoma                                                                | ypT4b ypN0                      | 1                     | N                                 |
| P3621   | Invasive Colorectal Adenocarcinoma                                                     | pT3 pN0                         | 1                     | N                                 |
| P4776   | Invasive Adenocarcinoma                                                                | pT4b pN1b                       | 1                     | N                                 |
| P9082   | Metastatic Adenocarcinoma, Colorectal Primary                                          | pT4b pN1b                       | 1                     | N                                 |
| P9083   | Metastatic Adenocarcinoma                                                              | N/A                             | 1                     | N                                 |
| P9084   | Metastatic Adenocarcinoma, Colorectal Primary                                          | N/A                             | 1                     | N                                 |
| P9085   | Metastatic Adenocarcinoma, Colorectal Primary                                          | ypT4b pN0 pM1a                  | 1                     | N                                 |
| P2592   | Metastatic Adenocarcinoma In Three Of Four Lymph Nodes                                 | N/A                             | 1                     | N                                 |
| P2574   | Metastatic Adenocarcinoma, Colorectal Primary                                          | T3N0                            | 1                     | N                                 |
| P9086   | Metastatic Adenocarcinoma, Colorectal Primary                                          | ypT1 pN1c pM1a                  | 1                     | N                                 |
| P9087   | Metastatic Adenocarcinoma, Colonic Primary                                             | pT3 pN1a                        | 1                     | N                                 |
| P9088   | Metastatic Adenocarcinoma, Colorectal Primary                                          | N/A                             | 1                     | N                                 |
| P5070   | Metastatic Adenocarcinoma                                                              | N/A                             | 1                     | N                                 |

Supplementary Table 3. Genes with significant methylation differences between healthy and patient-derived cfDNA in 20 patient cohort

| Gene           | q-value (fdr adjusted) | Mean difference between groups (healthy - cancer) |
|----------------|------------------------|---------------------------------------------------|
| SPIB           | 3.70E-06               | -41.39933674                                      |
| CDCA7          | 6.52E-06               | -53.22244908                                      |
| TMEM164        | 2.36E-05               | 18.216444                                         |
| COL10A1        | 0.00015059             | 17.13642991                                       |
| PLSCR4         | 0.000182298            | -34.87794316                                      |
| SLC25A1        | 0.000182298            | 60.89159323                                       |
| ELAC2          | 0.000447691            | 25.31557705                                       |
| ZNF572         | 0.000503628            | -59.14379304                                      |
| ENPP4          | 0.000600976            | 45.02995548                                       |
| GPER1          | 0.000616948            | 26.90489456                                       |
| PLAGL2         | 0.000616948            | 37.94148816                                       |
| RPUSD4         | 0.000616948            | 37.03039294                                       |
| NUF2           | 0.000836028            | -20.19624653                                      |
| SMIM10L2A      | 0.00083887             | 54.84387916                                       |
| GJC1           | 0.001031567            | 33.99002109                                       |
| ILRUN          | 0.001163916            | 10.93166634                                       |
| ZNF414         | 0.001198392            | -60.93005356                                      |
| ZNF772         | 0.001198392            | 35.83525929                                       |
| ELL2           | 0.00154547             | -30.51454594                                      |
| KLHL11         | 0.00154547             | 33.69456263                                       |
| LGR4           | 0.00160918             | -20.65861339                                      |
| LHCGR          | 0.001730388            | 20.15967146                                       |
| ADGRG4         | 0.002000412            | 29.8121374                                        |
| CTD-2545M3.6   | 0.002000412            | -41.10365785                                      |
| ELAPOR2        | 0.002000412            | 17.26097167                                       |
| MGMT           | 0.002000412            | 9.027538374                                       |
| NME1           | 0.002177991            | -51.33222625                                      |
| NRTN           | 0.002240827            | 20.54819725                                       |
| OSGEPL1        | 0.002240827            | 33.21504636                                       |
| AMDHD1         | 0.002413003            | 36.1677824                                        |
| MCHR2          | 0.002413003            | 25.94704782                                       |
| ROGDI          | 0.002413003            | 43.62026154                                       |
| ZNF774         | 0.002664044            | 33.96611201                                       |
| RER1           | 0.003040081            | 26.67522645                                       |
| OPN1MW2        | 0.00313277             | 29.30895359                                       |
| TUG1           | 0.00313277             | 44.06717689                                       |
| CAPN11         | 0.003149901            | 24.94768262                                       |
| MRPL52         | 0.003149901            | -40.1475143                                       |
| KIAA1143       | 0.003187013            | 24.34567563                                       |
| INTS6L         | 0.00397628             | 27.17036478                                       |
| ARMCX5-GPRASP2 | 0.004016938            | 29.95589663                                       |
| PSMD2          | 0.004016938            | 35.58255254                                       |
| PUS3           | 0.004285724            | 43.49319279                                       |
| LAMP2          | 0.004563378            | 22.05689646                                       |
| TBC1D22A       | 0.004563378            | 5.681992433                                       |
| TRIM51         | 0.004563378            | 43.78787467                                       |
| UCN            | 0.004563378            | 73.24983018                                       |
| CD79A          | 0.005618985            | -48.92757848                                      |
| DNHD1          | 0.005909211            | 11.01400976                                       |
| ADAMTS14       | 0.006008943            | 12.90419821                                       |
| RNA5S5         | 0.006008943            | 51.83139542                                       |
| ULBP3          | 0.006008943            | 33.96751199                                       |
| EPPIN          | 0.006158961            | 44.53709195                                       |
| SSU72          | 0.006158961            | 20.63218936                                       |
| ZBTB22         | 0.006220455            | -38.11904119                                      |
| FAIM           | 0.006354143            | 34.27565271                                       |
| TCTA           | 0.006503272            | 52.32468329                                       |
| OR4D2          | 0.006583676            | 39.60481249                                       |
| RETSAT         | 0.006583676            | 32.24024626                                       |
| RNFT1          | 0.006583676            | -46.78586976                                      |
| HSD3B7         | 0.006606003            | 36.44872641                                       |
| NXF2           | 0.006695395            | 17.65769516                                       |
| DICER1         | 0.007310389            | 14.5453317                                        |
| CNKSR2         | 0.007376806            | 22.62391933                                       |
| MAGEA9B        | 0.007376806            | 32.9689437                                        |
| GSTT2B         | 0.007446381            | 42.19318471                                       |
| TCL1B          | 0.007446381            | 30.32851384                                       |
| KAT2A          | 0.007576995            | 35.28736586                                       |
| NFE2L3         | 0.007683316            | 22.96929258                                       |
| TMEM150A       | 0.008110172            | 50.78549013                                       |
| ZIC3           | 0.008110172            | -14.66498911                                      |
| LAMTOR4        | 0.008516659            | 34.7124756                                        |
| CSDE1          | 0.008686958            | -23.89282634                                      |
| MRPS18A        | 0.008952295            | 27.97364516                                       |
| CCDC71         | 0.009340928            | 43.7421799                                        |
| CCL16          | 0.009555689            | 33.05517035                                       |
| LAMTOR2        | 0.009555689            | 48.04111602                                       |
| OR13A1         | 0.009555689            | 34.48973445                                       |
| GPATCH4        | 0.009717914            | -44.38019697                                      |
| EPS8L3         | 0.009912777            | 15.53967346                                       |

**Supplementary Table 4. Promoter regions with significant methylation differences between healthy and patient-derived cfDNA in 20 patient cohort**

| Gene         | q-value (fdr adjusted) | Mean difference between groups (healthy - cancer) |
|--------------|------------------------|---------------------------------------------------|
| ADAMTS5      | 0.000744332            | 74.3651579                                        |
| ATP6V1C2     | 0.000744332            | 55.08625782                                       |
| GOLGA3       | 0.001040288            | -65.84314568                                      |
| LMBR1L       | 0.001143591            | -52.98385531                                      |
| ZNF70        | 0.001740186            | 68.29381334                                       |
| IQCE         | 0.001868279            | 43.21712284                                       |
| MCTS2P       | 0.001868279            | -73.84181981                                      |
| NARS1        | 0.001868279            | 52.76182828                                       |
| PRMT6        | 0.001868279            | -62.78849577                                      |
| RBM3         | 0.001868279            | -62.67878454                                      |
| RFC4         | 0.001868279            | -67.19968029                                      |
| TNRC6A       | 0.001868279            | 57.38201821                                       |
| ZNF302       | 0.001868279            | 62.41968858                                       |
| ZNF347       | 0.001868279            | 66.00328427                                       |
| ZNF547       | 0.00226444             | -40.24916908                                      |
| LTA4H        | 0.003035531            | -66.28461522                                      |
| AC003002.4   | 0.003871603            | -39.316108                                        |
| GRAMD2B      | 0.003871603            | -67.33218618                                      |
| TRAPPC2B     | 0.003871603            | -39.316108                                        |
| TRIM37       | 0.004194124            | 63.26893732                                       |
| NCKIPSD      | 0.004398915            | -56.20384937                                      |
| ABRAXAS2     | 0.004432868            | 50.25232108                                       |
| TMC6         | 0.004432868            | -45.85008315                                      |
| TSSK4        | 0.004432868            | -74.37285432                                      |
| S100A6       | 0.004875013            | 63.98208544                                       |
| TASOR        | 0.005014826            | 54.74321695                                       |
| LACTB2       | 0.005026056            | 51.95163346                                       |
| NUMBL        | 0.005026056            | -46.12731636                                      |
| SYNJ1        | 0.005026056            | 44.01968376                                       |
| HLX          | 0.005736971            | -26.0744204                                       |
| C11orf49     | 0.006799178            | 49.14447271                                       |
| SOS2         | 0.006799178            | 47.26719909                                       |
| TRA2B        | 0.006865967            | 53.18400708                                       |
| CCDC63       | 0.007253305            | 40.34577853                                       |
| TATDN3       | 0.007253305            | 53.71590157                                       |
| TRNT1        | 0.007253305            | 60.64754018                                       |
| ZNF512       | 0.007253305            | 43.96701187                                       |
| RP11-529K1.3 | 0.007464227            | -50.32722662                                      |
| MRPL53       | 0.008000474            | 55.96806399                                       |
| ZNRF2        | 0.009027935            | 58.57515035                                       |
| TCAP         | 0.009356029            | 44.62004723                                       |
| ANKRD52      | 0.009626255            | 57.78896067                                       |

**Supplementary Table 5. Methods Comparison**

| <b>Method</b>         | <b>Sequencing Platform</b> | <b>Resolution</b> | <b>PCR-free</b> | <b>Input requirement</b> | <b>Comments</b>                                                             |
|-----------------------|----------------------------|-------------------|-----------------|--------------------------|-----------------------------------------------------------------------------|
| This work             | Oxford Nanopore            | Base-pair         | Yes             | pg to ng                 | Utilizes LSK110 latest chemistry on R9.4.1 flow cells                       |
| Conventional Nanopore | Oxford Nanopore            | Base-pair         | Yes             | >40ng                    | Barcoding adapters are stuck with an previous generation sequencing adapter |
| Bisulfite             | Illumina                   | Base-pair         | No              | tens to hundreds of ng   |                                                                             |
| Enzymatic             | Illumina                   | Base-pair         | No              | tens to hundreds of ng   |                                                                             |
| cfMeDIP-Seq           | Illumina                   | Binned            | Yes             | ng to hundreds of ng     | requires carrier                                                            |
